# Supplementary material
Source: Springer Nature journal article supplement (https://www.springermedizin.de/resource/supplementary/12936_2011_2026_MOESM2_ESM.pdf/9543230)

**Rainfall in Libreville**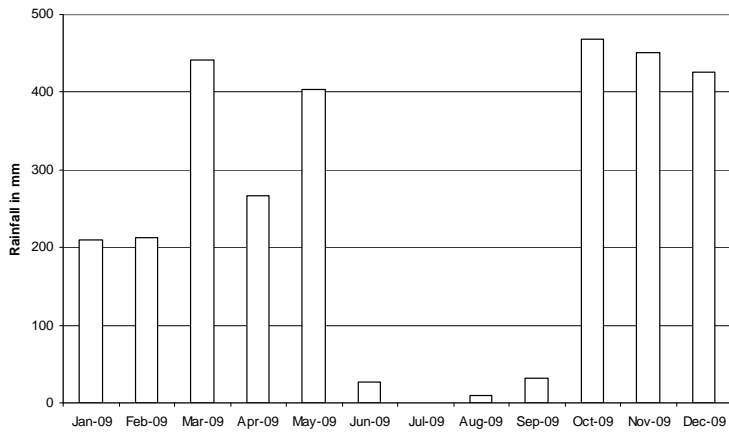**Libreville**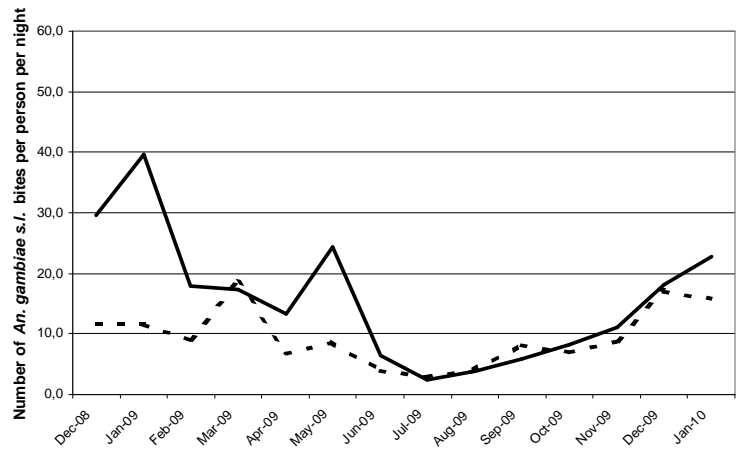**Alibandeng**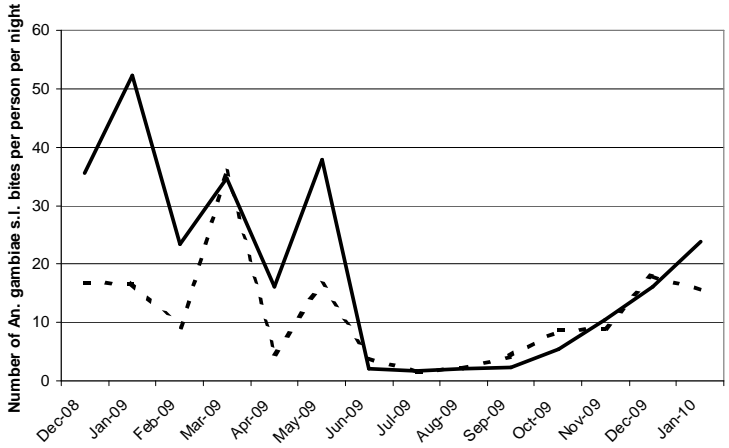**Camp des boys**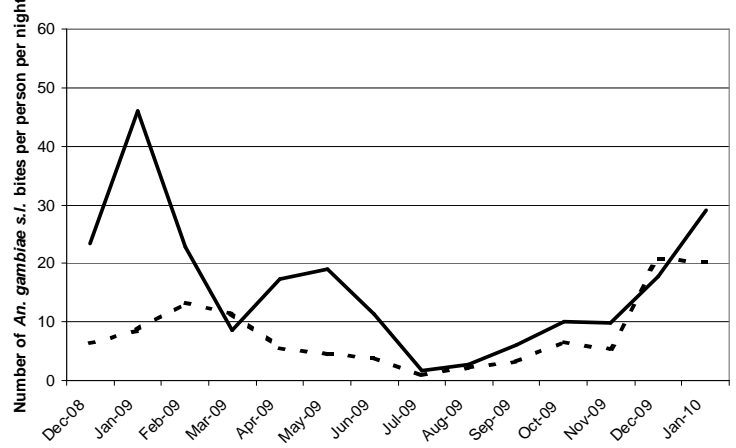**Beauséjour**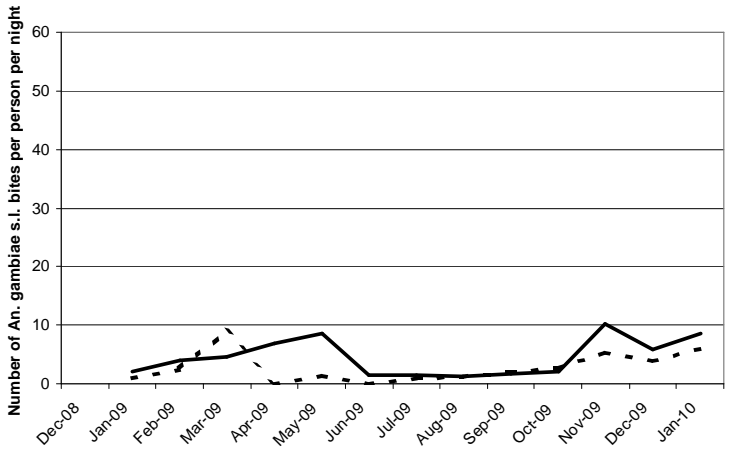**Sotega**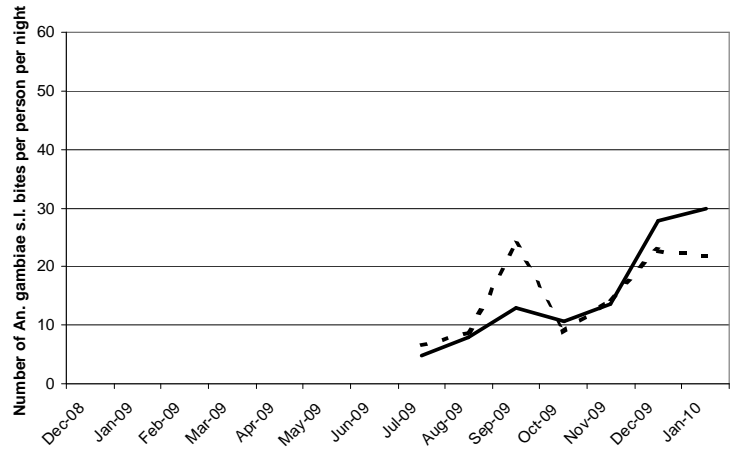

Supplement: MOESM2 [file 9543230]
